# Supplementary material for: The Use of Nitrogen and Its Regulation in Cereals: Structural Genes, Transcription Factors, and the Role of miRNAs
Source: Plants (Basel). 2019 Aug 20;8(8):294. doi: 10.3390/plants8080294 (PMC6724420; doi:10.3390/plants8080294)
Supplement: Supplementary file 1 [file plants-08-00294-s001.xlsx]

## Sheet: Table S1
Table S1. Nitrogen responsive miRNAs in rice, maize and wheat. The miRNAs listed in the table have been experimentally validated. Highligted in pink are the miRNAs with different expression behavior due to the different duration of the N stress treatment. References are numbered as in the reference list.
Conserved miRNA	Species	Response to N deficiency	Developmental stage	Tissue	Reference	Other details
miR1118	Triticum aestivum	up	seedling	roots	[82]
miR1129	Triticum aestivum	up	seedling	roots	[82]
miR1133	Triticum aestivum	down	seedling	roots	[82]
miR1136	Triticum aestivum	up	seedling	roots	[82]
miR1214	Zea mays	down	seedling	seedlings	[66]
miR1318	Oryza sativa	down	seedling	leaves	[79]
miR156	Triticum aestivum	up	seedling	roots	[82]
miR156j, miR171g, miR159c, miR159d, miR167a, miR167c, miR167d, miR167b, miR162, miR393b, miR164e, miR164f, miR167g, miR167i, miR167h	Zea mays	up	seedling	roots	[72]
miR156k	Oryza sativa	down	seedling	leaves	[79]
miR157	Zea mays	down	seedling	seedlings	[66]
miR159a.2	Oryza sativa	down	seedling	roots	[81]
miR160	Triticum aestivum	down	seedling	roots	[70]
miR160	Triticum durum	up	seedling	roots	[68]
miR160 a-e, g-i, m, f	Zea mays	up	seedling	roots	[65]
miR164	Oryza sativa	down	seedling	leaves, roots	[79]
miR164	Triticum aestivum	down	seedling	roots	[70]
miR164 a-h	Zea mays	up	seedling	leaves	[65]
miR164d	Triticum durum	down	seedling	roots	[68]	Short-term stress
miR164d	Triticum durum	up	seedling	roots	[68]	Chronic stress
miR166j/k/n	Zea mays	down	seedling	roots	[75]
miR166k	Triticum durum	down	seedling	roots	[68]
miR167	Oryza sativa	down	seedling	roots	[79]
miR167 a-d, n, o-t	Oryza sativa	down	seedling	roots	[65]
miR167h	Triticum durum	up	seedling	roots	[68]
miR167h	Triticum durum	up	grain filling	leaves	[67]
miR167h	Triticum durum	down	grain filling	roots	[67]
miR168	Oryza sativa	down	seedling	roots	[79]
miR168 a-c	Zea mays	up	seedling	roots	[65]
miR169	Zea mays	down	seedling	seedlings	[66]
miR169 f-h	Zea mays	up	seedling	roots	[65]
miR169 p, i-k	Zea mays	up	seedling	leaves, roots	[65]	Transient stress
miR169 p, i-k, f-h	Zea mays	down	seedling	leaves, roots	[65]	Chronic stress
miR169a, miR169b, miR169e, miR169f, miR169h, miR169n	Triticum aestivum	down	seedling	roots, shoots	[73]
miR169a, miR169c, miR169r, miR398b, miR398a, miR169m, miR169n, miR169q, miR169f, miR169h, miR528a, miR528b, miR169g, miR164f, miR397b, miR397a, miR408, miR408b, miR164h	Zea mays	down	seedling	shoots	[72]
miR169b	Oryza sativa	down	seedling	roots	[81]
miR169c	Triticum durum	down	grain filling	leaves and stems	[67]
miR169d	Zea mays	down	seedling	leaves	[65]
miR169d,e,f-h	Zea mays	down	seedling	leaves	[65]
miR169e	Oryza sativa	down	seedling	roots	[81]
miR169i/j/k, miR169i*/j*/k*	Zea mays	down	seedling	roots	[75]
miR169p, miR169g, miR397b, miR169c, miR169r, miR408, miR408b, miR169a, miR169i, miR169j, miR169k, miR164h, miR169b, miR396e, miR396f, miR827, miR399a, miR399c, miR399h, miR395o, miR395b, miR395d, miR395e, miR395f, miR395g, miR395h, miR395i, miR395j, miR395n, miR395p, miR395a, miR528b, miR528a, miR399g	Zea mays	down	seedling	roots	[72]
miR171h, miR171k, miR162, miR172e, miR394a, miR394b, miR167j, miR167e, miR167f	Zea mays	up	seedling	shoots	[72]
miR172a-f	Zea mays	up	seedling	leaves	[65]
miR172d-5p	Oryza sativa	up	seedling	roots	[81]
miR2199	Zea mays	down	seedling	seedlings	[66]
miR2275	Triticum aestivum	up	seedling	seedlings	[83]
miR319 a-e	Zea mays	up	seedling	roots	[65]
miR319b	Triticum durum	up	grain filling	leaves and stems	[67]
miR393c	Triticum durum	down	grain filling	roots, leaves and stems	[67]
miR395 a, b, d-j, n, p	Zea mays	down	seedling	roots	[65]	Chronic stress
miR395 a, b, d-j, n, p	Zea mays	up	seedling	roots	[65]	Transient stress
miR397	Zea mays	down	seedling	seedlings	[66]
miR3979-3p	Oryza sativa	down	seedling	roots	[81]
miR397a,b	Zea mays	down	seedling	leaves	[65]
miR398	Zea mays	down	seedling	seedlings	[66]
miR398b,c	Zea mays	down	seedling	leaves	[65]
miR399	Triticum durum	down	seedling	roots and leaves	[68,70,82]
miR399 d, j	Zea mays	down	seedling	roots, leaves	[65]	Chronic stress
miR399 d, j	Zea mays	up	seedling	roots	[65]	Transient stress
miR399b	Triticum durum	down	grain filling	roots	[67]
miR399i	Oryza sativa	up	seedling	leaves	[95]
miR408	Zea mays	down	seedling	leaves, roots	[65]
miR408	Zea mays	down	seedling	seedlings	[66]
miR408/b	Zea mays	down	seedling	roots	[75]
miR415	Zea mays	down	seedling	seedlings	[66]
miR444	Triticum aestivum	up	seedling	roots and leaves	[76,82]
miR444a	Triticum durum	up	seedling	roots	[68]
miR444a.4-3p	Oryza sativa	down	seedling	roots	[64]
miR444a-5p	Oryza sativa	up	seedling	roots	[81]
miR444d	Triticum durum	up	grain filling	roots	[67]
miR528	Oryza sativa	down	seedling	leaves, roots	[79]
miR528	Zea mays	down	seedling	leaves, roots	[65]
miR528a/b,miR528a*/b	Zea mays	down	seedling	roots	[75]
miR529b	Oryza sativa	up	seedling	roots	[81]
miR530	Oryza sativa	down	seedling	leaves	[95]
miR820	Oryza sativa	down	seedling	leaves	[79]
miR821	Oryza sativa	down	seedling	leaves	[79]
miR827	Zea mays	down	seedling	seedlings	[66]
miR827	Zea mays	up	seedling	leaves	[65]	Chronic stress
miR827	Zea mays	down	seedling	leaves	[65]	Transient stress
miR827a	Triticum durum	up	seedling	roots	[68]
miR827a	Triticum durum	up	grain filling	leaves and stems	[67]
miR827a	Triticum durum	down	seedling	leaves	[68]

## Sheet: Table S1_modifications
Table S1. Nitrogen responsive miRNAs in rice, maize and wheat. The miRNAs listed in the table have been experimentally validated. Highligted in pink are the miRNAs with different expression behavior due to the different duration of the N stress treatment. References are numbered as in the reference list.
Conserved miRNA	Species	Response to N deficiency	Developmental stage	Tissue	Reference	Other details
miR1118	Triticum aestivum	up	seedling	roots	[82]
miR1129	Triticum aestivum	up	seedling	roots	[82]
miR1133	Triticum aestivum	down	seedling	roots	[82]
miR1136	Triticum aestivum	up	seedling	roots	[82]
miR1214	Zea mays	down	seedling	seedlings	[66]
miR1318	Oryza sativa	down	seedling	leaves	[79]
miR156	Triticum aestivum	up	seedling	roots	[82]
miR156j, miR171g, miR159c, miR159d, miR167a, miR167c, miR167d, miR167b, miR162, miR393b, miR164e, miR164f, miR167g, miR167i, miR167h	Zea mays	up	seedling	roots	[72]
miR156k	Oryza sativa	down	seedling	leaves	[79]
miR157	Zea mays	down	seedling	seedlings	[66]
miR159a.2	Oryza sativa	down	seedling	roots	[81]
miR160	Triticum aestivum	down	seedling	roots	[70]
miR160	Triticum durum	up	seedling	roots	[68]
miR160 a-e, g-i, m, f	Zea mays	up	seedling	roots	[65]
miR164	Oryza sativa	down	seedling	leaves, roots	[79]
miR164	Triticum aestivum	down	seedling	roots	[70]
miR164 a-h	Zea mays	up	seedling	leaves	[65]
miR164d	Triticum durum	down	seedling	roots	[68]	Short-term stress
miR164d	Triticum durum	up	seedling	roots	[68]	Chronic stress
miR166j/k/n	Zea mays	down	seedling	roots	[75]
miR166k	Triticum durum	down	seedling	roots	[68]
miR167	Oryza sativa	down	seedling	roots	[79]
miR167 a-d, n, o-t	Oryza sativa	down	seedling	roots	[65]
miR167h	Triticum durum	up	seedling	roots	[68]
miR167h	Triticum durum	up	grain filling	leaves	[67]
miR167h	Triticum durum	down	grain filling	roots	[67]
miR168	Oryza sativa	down	seedling	roots	[79]
miR168 a-c	Zea mays	up	seedling	roots	[65]
miR169	Zea mays	down	seedling	seedlings	[66]
miR169 f-h	Zea mays	up	seedling	roots	[65]
miR169 p, i-k	Zea mays	up	seedling	leaves, roots	[65]	Transient stress
miR169 p, i-k, f-h	Zea mays	down	seedling	leaves, roots	[65]	Chronic stress
miR169a, miR169b, miR169e, miR169f, miR169h, miR169n	Triticum aestivum	down	seedling	roots, shoots	[73]
miR169a, miR169c, miR169r, miR398b, miR398a, miR169m, miR169n, miR169q, miR169f, miR169h, miR528a, miR528b, miR169g, miR164f, miR397b, miR397a, miR408, miR408b, miR164h	Zea mays	down	seedling	shoots	[72]
miR169b	Oryza sativa	down	seedling	roots	[81]
miR169c	Triticum durum	down	grain filling	leaves and stems	[67]
miR169d	Zea mays	down	seedling	leaves	[65]
miR169d,e,f-h	Zea mays	down	seedling	leaves	[65]
miR169e	Oryza sativa	down	seedling	roots	[81]
miR169i/j/k, miR169i*/j*/k*	Zea mays	down	seedling	roots	[75]
miR169p, miR169g, miR397b, miR169c, miR169r, miR408, miR408b, miR169a, miR169i, miR169j, miR169k, miR164h, miR169b, miR396e, miR396f, miR827, miR399a, miR399c, miR399h, miR395o, miR395b, miR395d, miR395e, miR395f, miR395g, miR395h, miR395i, miR395j, miR395n, miR395p, miR395a, miR528b, miR528a, miR399g	Zea mays	down	seedling	roots	[72]
miR171h, miR171k, miR162, miR172e, miR394a, miR394b, miR167j, miR167e, miR167f	Zea mays	up	seedling	shoots	[72]
miR172a-f	Zea mays	up	seedling	leaves	[65]
miR172d-5p	Oryza sativa	up	seedling	roots	[81]
miR2199	Zea mays	down	seedling	seedlings	[66]
miR2275	Triticum aestivum	up	seedling	seedlings	[83]
miR319 a-e	Zea mays	up	seedling	roots	[65]
miR319b	Triticum durum	up	grain filling	leaves and stems	[67]
miR393c	Triticum durum	down	grain filling	roots, leaves and stems	[67]
miR395 a, b, d-j, n, p	Zea mays	down	seedling	roots	[65]	Chronic stress
miR395 a, b, d-j, n, p	Zea mays	up	seedling	roots	[65]	Transient stress
miR397	Zea mays	down	seedling	seedlings	[66]
miR3979-3p	Oryza sativa	down	seedling	roots	[81]
miR397a,b	Zea mays	down	seedling	leaves	[65]
miR398	Zea mays	down	seedling	seedlings	[66]
miR398b,c	Zea mays	down	seedling	leaves	[65]
miR399	Triticum durum	down	seedling	roots and leaves	[68,70,82]
miR399 d, j	Zea mays	down	seedling	roots, leaves	[65]	Chronic stress
miR399 d, j	Zea mays	up	seedling	roots	[65]	Transient stress
miR399b	Triticum durum	down	grain filling	roots	[67]
miR399i	Oryza sativa	up	seedling	leaves	[95]
miR408	Zea mays	down	seedling	leaves, roots	[65]
miR408	Zea mays	down	seedling	seedlings	[66]
miR408/b	Zea mays	down	seedling	roots	[75]
miR415	Zea mays	down	seedling	seedlings	[66]
miR444	Triticum aestivum	up	seedling	roots and leaves	[76,82]
miR444a	Triticum durum	up	seedling	roots	[68]
miR444a.4-3p	Oryza sativa	down	seedling	roots	[64]
miR444a-5p	Oryza sativa	up	seedling	roots	[81]
miR444d	Triticum durum	up	grain filling	roots	[67]
miR528	Oryza sativa	down	seedling	leaves, roots	[79]
miR528	Zea mays	down	seedling	leaves, roots	[65]
miR528a/b,miR528a*/b	Zea mays	down	seedling	roots	[75]
miR529b	Oryza sativa	up	seedling	roots	[81]
miR530	Oryza sativa	down	seedling	leaves	[95]
miR820	Oryza sativa	down	seedling	leaves	[79]
miR821	Oryza sativa	down	seedling	leaves	[79]
miR827	Zea mays	down	seedling	seedlings	[66]
miR827	Zea mays	up	seedling	leaves	[65]	Chronic stress
miR827	Zea mays	down	seedling	leaves	[65]	Transient stress
miR827a	Triticum durum	up	seedling	roots	[68]
miR827a	Triticum durum	up	grain filling	leaves and stems	[67]
miR827a	Triticum durum	down	seedling	leaves	[68]
